# Supplementary material
Source: PubMed Central journal article supplement (PMC2970651)
Supplement: NIHMS241957-supplement-supplement.pdf [file NIHMS241957-supplement-supplement.pdf]

## Supporting Information

### Anticonvulsant Activity of 2,4(5)-Diarylimidazoles in Mice and Rats Acute Seizure Models

Valentina Zuliani<sup>\*,‡</sup>, Marco Fantini<sup>\*</sup>, Aradhya Nigam<sup>#</sup>, James P. Stables<sup>§</sup>, Manoj K. Patel<sup>#</sup> and  
Mirko Rivara<sup>\*</sup>

*\*Dipartimento Farmaceutico, Università degli Studi di Parma, V.le G.P. Usberti, 27/A, I-43124  
Parma, Italy. §National Institute of Neurological Disease and Stroke (J.P.S.) ASP Program,  
Rockville, Maryland 20852. #Department of Anesthesiology, University of Virginia, Charlottesville,  
VA 22908, USA*

**Table 1.** Anticonvulsant Activity and Toxicity of Compounds **3-29** Administered Intraperitoneally to Mice

|    |                                                                                   |     |     |     |     |     |     |     |
|----|-----------------------------------------------------------------------------------|-----|-----|-----|-----|-----|-----|-----|
| 13 | 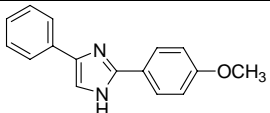 | 30  | 0/1 | 0/1 | 0/1 | 0/1 | 0/4 | 0/2 |
|    |                                                                                   | 100 | 3/3 | 2/3 | 0/1 | 0/1 | 0/8 | 0/4 |
|    |                                                                                   | 300 | 1/1 | 1/1 | 1/1 | 0/1 | 4/4 | 2/2 |

| Compd | Structure                                                                           | Dose<br>mg/kg | MES <sup>a</sup>  |                 | scMet <sup>b</sup> |                 | Tox <sup>c</sup>  |                 |
|-------|-------------------------------------------------------------------------------------|---------------|-------------------|-----------------|--------------------|-----------------|-------------------|-----------------|
|       |                                                                                     |               | 0.5h <sup>d</sup> | 4h <sup>d</sup> | 0.5h <sup>d</sup>  | 4h <sup>d</sup> | 0.5h <sup>d</sup> | 4h <sup>d</sup> |
| 3     | 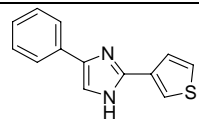   | 30            | 0/1               | 0/1             | 0/1                | 0/1             | 0/4               | 0/2             |
|       |                                                                                     | 100           | 3/3               | 0/3             | 0/1                | 0/1             | 5/8               | 0/4             |
|       |                                                                                     | 300           | 1/1               | 1/1             | 0/1                | 0/1             | 4/4               | 1/2             |
| 4     |    | 30            | 0/1               | 0/1             | 0/1                | 0/1             | 0/4               | 0/2             |
|       |                                                                                     | 100           | 1/3               | 0/3             | 0/1                | 0/1             | 1/8               | 0/4             |
|       |                                                                                     | 300           | 1/1               | 0/0             | 1/1                | 0/0             | 4/4               | 1/1             |
| 5     |    | 30            | 0/1               | 0/1             | 0/1                | 0/1             | 0/4               | 0/2             |
|       |                                                                                     | 100           | 1/3               | 0/3             | 0/1                | 0/1             | 0/8               | 0/4             |
|       |                                                                                     | 300           | 1/1               | 1/1             | 0/1                | 0/1             | 4/4               | 2/2             |
| 6     |   | 30            | 0/1               | 0/1             | 0/1                | 0/1             | 0/4               | 0/2             |
|       |                                                                                     | 100           | 0/3               | 0/3             | 0/1                | 0/1             | 0/8               | 0/4             |
|       |                                                                                     | 300           | 0/1               | 0/1             | 0/1                | 0/1             | 0/4               | 0/4             |
| 7     |  | 30            | 0/1               | 0/1             | 0/1                | 0/1             | 0/4               | 0/2             |
|       |                                                                                     | 100           | 2/3               | 1/3             | 0/1                | 0/1             | 5/8               | 0/4             |
|       |                                                                                     | 300           | 1/1               | 1/1             | 0/1                | 1/1             | 4/4               | 2/2             |
| 8     |  | 30            | 0/1               | 0/1             | 0/1                | 0/1             | 0/4               | 0/2             |
|       |                                                                                     | 100           | 3/3               | 0/3             | 1/1                | 0/1             | 1/8               | 0/4             |
|       |                                                                                     | 300           | 1/1               | 1/1             | 1/1                | 0/1             | 3/4               | 1/2             |
| 9     |  | 30            | 0/1               | 0/1             | 0/1                | 0/1             | 0/4               | 0/2             |
|       |                                                                                     | 100           | 0/2               | 0/2             | 0/0                | 0/1             | 4/8               | 0/3             |
|       |                                                                                     | 300           | 0/0               | 0/1             | 0/0                | 0/0             | 3/4               | 0/1             |
| 10    |  | 30            | 1/1               | 0/1             | 0/1                | 0/1             | 0/4               | 0/2             |
|       |                                                                                     | 100           | 3/3               | 0/3             | 0/1                | 0/1             | 1/8               | 0/4             |
|       |                                                                                     | 300           | 1/1               | 1/1             | 0/1                | 0/1             | 4/4               | 1/2             |
| 11    |  | 30            | 0/1               | 0/1             | 0/1                | 0/1             | 0/4               | 0/2             |
|       |                                                                                     | 100           | 0/3               | 0/3             | 0/1                | 0/1             | 0/8               | 0/4             |
|       |                                                                                     | 300           | 0/1               | 0/1             | 0/1                | 0/1             | 0/4               | 0/2             |
| 12    |  | 30            | 0/1               | 0/1             | 0/1                | 0/1             | 0/4               | 0/2             |
|       |                                                                                     | 100           | 1/3               | 0/3             | 0/1                | 0/1             | 0/8               | 0/4             |
|       |                                                                                     | 300           | 1/1               | 1/1             | 1/1                | 0/1             | 2/4               | 0/2             |

|    |                                                                                     |     |                  |                  |     |     |                  |                  |
|----|-------------------------------------------------------------------------------------|-----|------------------|------------------|-----|-----|------------------|------------------|
| 14 | 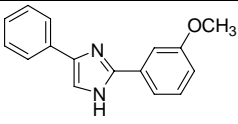   | 30  | 0/1              | 0/1              | 0/1 | 0/1 | 0/4              | 0/2              |
|    |                                                                                     | 100 | 3/3              | 1/3              | 0/1 | 0/1 | 8/8              | 0/4              |
|    |                                                                                     | 300 | 1/1              | 1/1              | 0/1 | 0/1 | 3/4              | 0/2              |
| 15 |    | 30  | 0/1              | 0/1              | 0/1 | 0/1 | 0/4              | 0/2              |
|    |                                                                                     | 100 | 1/3              | 1/3              | 0/1 | 0/1 | 0/8              | 0/4              |
|    |                                                                                     | 300 | 1/1              | 1/1              | 0/1 | 2/5 | 0/4              | 0/2              |
| 16 |    | 30  | 0/1              | 0/1              | 0/1 | 0/1 | 0/4              | 0/2              |
|    |                                                                                     | 100 | 2/3              | 0/3              | 0/1 | 0/1 | 0/8              | 0/4              |
|    |                                                                                     | 300 | 1/1              | 1/1              | 0/1 | 0/1 | 0/4              | 0/2              |
| 17 |    | 30  | 0/1              | 0/1              | 0/1 | 0/1 | 0/4              | 0/2              |
|    |                                                                                     | 100 | 0/3 <sup>e</sup> | 0/3 <sup>e</sup> | 0/1 | 0/1 | 0/8 <sup>f</sup> | 0/4 <sup>f</sup> |
|    |                                                                                     | 300 | 1/1              | 1/1              | 0/1 | 0/1 | 0/4              | 0/2              |
| 18 |    | 30  | 0/1              | 0/1              | 0/1 | 0/1 | 0/4              | 0/2              |
|    |                                                                                     | 100 | 0/3 <sup>g</sup> | 0/3 <sup>g</sup> | 0/1 | 0/1 | 0/8 <sup>h</sup> | 0/4 <sup>h</sup> |
|    |                                                                                     | 300 | 0/1              | 1/1              | 0/1 | 0/1 | 2/4              | 0/2              |
| 19 |   | 30  | 0/1              | 0/1              | 0/1 | 0/1 | 0/4              | 0/2              |
|    |                                                                                     | 100 | 3/3              | 0/3              | 0/1 | 0/1 | 0/8              | 0/4              |
|    |                                                                                     | 300 | 1/1              | 1/1              | 0/1 | 0/1 | 2/4              | 0/2              |
| 20 |  | 30  | 0/1              | 0/1              | 0/1 | 0/1 | 0/4              | 0/2              |
|    |                                                                                     | 100 | 3/3              | 0/3              | 0/1 | 0/1 | 0/8              | 0/4              |
|    |                                                                                     | 300 | 1/1              | 1/1              | 0/1 | 0/1 | 2/4              | 0/2              |
| 21 |  | 30  | 0/1              | 0/1              | 0/1 | 0/1 | 0/4              | 0/2              |
|    |                                                                                     | 100 | 3/3              | 1/3              | 0/1 | 0/1 | 0/8              | 0/4              |
|    |                                                                                     | 300 | 1/1              | 1/1              | 1/1 | 0/1 | 4/4              | 2/2              |
| 22 |  | 30  | 0/1              | 0/1              | 0/1 | 0/1 | 0/4              | 0/2              |
|    |                                                                                     | 100 | 3/3              | 1/7              | 0/1 | 0/1 | 1/8              | 0/4              |
|    |                                                                                     | 300 | 1/1              | 0/5              | 0/1 | 0/1 | 1/4              | 0/2              |
| 23 |  | 30  | 0/1              | 0/1              | 0/1 | 0/1 | 0/4              | 0/2              |
|    |                                                                                     | 100 | 1/3              | 0/3              | 0/1 | 0/1 | 0/8              | 0/4              |
|    |                                                                                     | 300 | 1/1              | 1/1              | 0/1 | 0/1 | 0/4              | 0/2              |

|    |                                                                                     |     |     |     |     |     |     |     |
|----|-------------------------------------------------------------------------------------|-----|-----|-----|-----|-----|-----|-----|
| 24 | 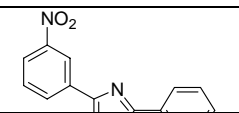 | 30  | 0/1 | 0/1 | 0/1 | 0/1 | 0/4 | 0/2 |
|    |                                                                                     | 100 | 2/3 | 0/3 | 0/1 | 0/1 | 0/8 | 0/4 |

|    |                                                                                    |     |                  |     |     |     |                  |     |
|----|------------------------------------------------------------------------------------|-----|------------------|-----|-----|-----|------------------|-----|
|    |                                                                                    | 300 | 1/1              | 1/1 | 0/1 | 0/1 | 0/4              | 0/2 |
| 25 | 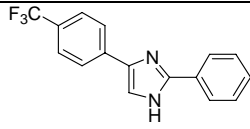  | 30  | 0/1              | 0/1 | 0/1 | 0/1 | 0/4              | 0/2 |
|    |                                                                                    | 100 | 1/3              | 0/3 | 0/1 | 0/1 | 1/8              | 0/4 |
|    |                                                                                    | 300 | 1/1              | 0/0 | 0/1 | 1/1 | 3/4              | 1/1 |
| 26 |   | 30  | 1/1 <sup>i</sup> | 0/1 | 0/1 | 0/1 | 0/4 <sup>l</sup> | 0/2 |
|    |                                                                                    | 100 | 1/2 <sup>i</sup> | 1/3 | 0/1 | 0/1 | 1/8 <sup>l</sup> | 0/4 |
|    |                                                                                    | 300 | 1/1 <sup>i</sup> | 1/1 | 0/1 | 0/1 | 2/4 <sup>l</sup> | 1/2 |
| 27 |   | 30  | 0/1              | 0/1 | 0/1 | 0/1 | 0/4              | 0/2 |
|    |                                                                                    | 100 | 0/3              | 0/3 | 0/1 | 0/1 | 0/8              | 0/4 |
|    |                                                                                    | 300 | 0/1              | 0/1 | 0/1 | 0/1 | 0/4              | 0/2 |
| 28 |   | 30  | 0/1              | 0/1 | 0/1 | 0/1 | 0/4              | 0/2 |
|    |                                                                                    | 100 | 0/3              | 0/3 | 0/1 | 0/1 | 0/8              | 0/4 |
|    |                                                                                    | 300 | 0/1              | 1/1 | 0/1 | 0/1 | 0/4              | 0/2 |
| 29 |  | 30  | 1/5              | 0/1 | 0/1 | 0/1 | 0/4              | 0/2 |
|    |                                                                                    | 100 | 0/3              | 1/3 | 0/1 | 0/1 | 0/8              | 0/4 |
|    |                                                                                    | 300 | 0/1              | 1/1 | 0/1 | 0/1 | 0/4              | 0/2 |

<sup>a</sup>Maximal electroshock test (number of animals protected/number of animals tested at the given time point). <sup>b</sup>Subcutaneous metrazol test (number of animals protected/number of animals tested). <sup>c</sup>Neurotoxicity (number of animals protected/number of animals tested). <sup>d</sup>Time of test after drug administration. <sup>e</sup>Also tested at 0.25h (2/3), 1h (1/3) and 2h (0/3). <sup>f</sup>Also tested at 0.25h (0/3), 1h (0/3) and 2h (0/3). <sup>g</sup>Also tested at 2h (1/3). <sup>h</sup>Also tested at 2h (0/3). <sup>i</sup>Also tested at 3 mg/kg (0/4) and 10 mg/kg (0/4). <sup>l</sup>Also tested at 3 mg/kg (0/4) and 10 mg/kg (0/4).

**Table 2.** Anticonvulsant Activity and Toxicity of Compounds **8, 10, 13, 16, 17, 19-22, 24** Administered Orally (30 mg/kg) to Rats

| Compd     | Structure                                                                           | MES <sup>a</sup>   |                   |                 |                 |                 | TOX <sup>b</sup>     |
|-----------|-------------------------------------------------------------------------------------|--------------------|-------------------|-----------------|-----------------|-----------------|----------------------|
|           |                                                                                     | 0.25h <sup>c</sup> | 0.5h <sup>c</sup> | 1h <sup>c</sup> | 2h <sup>c</sup> | 4h <sup>c</sup> |                      |
| <b>8</b>  | 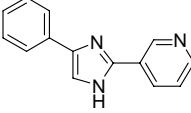   | 1/4                | 0/4               | 1/4             | 0/4             | 0/4             | 0/4 (-) <sup>d</sup> |
| <b>10</b> |    | 2/4                | 2/4               | 1/4             | 0/4             | 0/4             | 0/4 (-) <sup>d</sup> |
| <b>13</b> |    | 2/4                | 0/4               | 3/4             | 2/4             | 0/4             | 0/4 (-) <sup>d</sup> |
| <b>16</b> |    | 0/4                | 0/4               | 1/4             | 0/4             | 1/4             | 0/4(-) <sup>d</sup>  |
| <b>17</b> |  | 0/4                | 1/4               | 2/4             | 1/4             | 2/4             | 0/4(-) <sup>d</sup>  |
| <b>19</b> |  | 0/4                | 0/4               | 0/4             | 0/4             | 0/4             | 0/4 (-) <sup>d</sup> |
| <b>20</b> |  | 0/4                | 0/4               | 2/4             | 0/4             | 0/4             | 0/4 (-) <sup>d</sup> |
| <b>21</b> |  | 0/4                | 0/4               | 0/4             | 0/4             | 1/4             | 0/4 (-) <sup>d</sup> |
| <b>22</b> |  | 1/4                | 0/4               | 0/4             | 0/4             | 0/4             | 0/4 (-) <sup>d</sup> |
| <b>24</b> |  | 0/4                | 0/4               | 0/4             | 0/4             | 0/4             | 0/4 (-) <sup>d</sup> |

<sup>a</sup>Maximal electroshock test (number of animals protected/number of animals tested). <sup>b</sup>Neurotoxicity (number of animals protected/number of animals tested). <sup>c</sup>Time after drug administration. <sup>d</sup>(-) No neurotoxicity at doses tested.

**Table 3.** Quantitative anticonvulsant activity (MES and scMet), toxicity in mice (i.p.; tested at 0.25h) and IC<sub>50</sub> values for inhibition of hNav1.2 Na currents of compounds **10**, **13**, **17** and **20**

| Compd                 | MES <sup>a</sup> ED <sub>50</sub> <sup>b</sup> | PI <sup>c</sup> | scMet <sup>d</sup> ED <sub>50</sub> <sup>b</sup> | PI <sup>e</sup> | TD <sub>50</sub> <sup>f,b</sup>     | hNav1.2<br>IC <sub>50</sub> (μM) |
|-----------------------|------------------------------------------------|-----------------|--------------------------------------------------|-----------------|-------------------------------------|----------------------------------|
| <b>10</b>             | 61.7 <sup>g</sup><br>(51.9-71.4)               | 2.1             | 160.9 <sup>g</sup><br>(138.6-187.0)              | 0.8             | 126.8 <sup>g</sup><br>(107.6-140.2) | 40.6                             |
| <b>13</b>             | 46.8 <sup>h</sup><br>(44.0-52.0)               | 4.3             | 142.2 <sup>h</sup><br>(103.6-203.4)              | 1.4             | 200.8 <sup>h</sup><br>(163.0-243.6) | 21.4                             |
| <b>17<sup>i</sup></b> | 129.5 <sup>j</sup><br>(101.5-163.3)            | ~5.0            | >300 <sup>j</sup>                                | /               | >500 <sup>j</sup>                   | 10.1                             |
| <b>20</b>             | 136.7 <sup>k</sup><br>(112.3-159.9)            | ~5.0            | >250 <sup>k</sup>                                | /               | >500 <sup>k</sup>                   | 17.9                             |
| <b>Phenytoin</b>      | 9.5<br>(8.1-10.4)                              | 6.9             | /                                                | /               | 65.5                                | >100                             |

<sup>a</sup>Maximal electroshock test (number of animals protected/number of animals tested). <sup>b</sup>The interval in parentheses stands for the 95% confidence interval. <sup>c</sup>Protective index (PI = TD<sub>50</sub>/ED<sub>50</sub>) in the MES test. <sup>d</sup>Subcutaneous metrazol test (number of animals protected/number of animals tested). <sup>e</sup>Protective index (PI = TD<sub>50</sub>/ED<sub>50</sub>) in the scMet test. <sup>f</sup>Neurotoxicity (number of animals protected/number of animals tested). <sup>g</sup>The ratios of protected-to-tested mice were 1/8 (45 mg/Kg), 3/8 (60 mg/Kg), 7/8 (80 mg/Kg) and 8/8 (100 mg/Kg) (MES) and 1/8 (130 mg/Kg), 4/8 (160 mg/Kg) and 7/8 (200 mg/Kg) (scMet). The ratio of neurotoxic-to-tested mice was 0/8 (80 mg/Kg), 2/8 (120 mg/Kg), 6/8 (130 mg/Kg), 7/8 (160 mg/Kg) and 8/8 (200 mg/Kg). <sup>h</sup>The ratios of protected-to-tested mice were 0/8 (35 mg/Kg), 1/8 (41 mg/Kg), 8/16 (46 mg/Kg), 5/8 (50 mg/Kg) and 8/8 (70 mg/Kg) (MES) and 0/8 (70 mg/Kg), 4/8 (125 mg/Kg) and 6/8 (200 mg/Kg) (scMet). The ratio of



neurotoxic-to-tested mice was 0/8 (70 mg/Kg), 1/8 (125 mg/Kg), 4/8 (175 mg/Kg), 8/16 (225 mg/Kg) and 8/8 (350 mg/Kg). <sup>i</sup>Tested at 1h. <sup>j</sup>The ratios of protected-to-tested mice were 0/8 (60 mg/Kg), 2/8 (100 mg/Kg), 5/8 (140 mg/Kg) and 7/8 (200 mg/Kg) (MES) and 0/3 (75 mg/Kg), 0/3 (150 mg/Kg) and 0/3 (300 mg/Kg) (scMet). The ratio of neurotoxic-to-tested mice was 0/8 (140 mg/Kg) and 4/8 (500 mg/Kg). <sup>k</sup>The ratios of protected-to-tested mice were 1/8 (100 mg/Kg), 4/8 (135 mg/Kg), 6/8 (170 mg/Kg) and 8/8 (230 mg/Kg) (MES) and 0/3 (125 mg/Kg) and 0/3 (250 mg/Kg) (scMet). The ratio of neurotoxic-to-tested mice was 0/8 (350 mg/Kg) and 0/8 (500 mg/Kg).
